# Supplementary material for: Identifying flare prone Spondyloarthritis – insights from a prospective cohort
Source: Research Square preprint supplement (doi:10.21203/rs.3.rs-7045624/v1), 2025-07-29
Supplement: Supplementary file 1 [file 2487d9aff83109ddd60e7d78.docx]

**Sample size estimation formula:**

n = [ (Z_(1-α/2) * √[2 * P * (1 - P)] + Z_(1-β) * √[P1 * (1 - P1) + P2 * (1 - P2)] )² ] / (P1 - P2)²

Adjustment for repeated measures design : n_adjusted = n / [1 + (m - 1) * ρ]

| **Study Author/ Country** | **Study type/**  **Sample size** | **Definition of flare** | **Most cited association for Flare/ Incidence of flare** | **Types of flare** | **Significant statistical associations with flare** |
| --- | --- | --- | --- | --- | --- |
| Roxanne Cooksey et al (6(6) | Prospective data from RCT/ **134** | Patient reported severe pain and immobility with systemic features. | Not cited.  Incidence of 70% | Major/ Generalized flares, Minor /Localised flares | Major/ generalized flare associated with higher disease activity, night pain, poor functional scores and preceded by minor flares. |
| M.Dougados et al (4) | Prospective data from SPARSE trial/ **32** | Patient-recorded details of restarting NSAID | Not cited.  Incidence of 35% | No types identified. | Absolute change of BASDAI ≥2 or a relative change ≥30% in most BASDAI components consistent with meaningful symptomatic deterioration |
| Wetterslev et al (21) | Prospective data | BASDAI ≥ 4 and change ≥ 2 since inclusion with clinical manifestations in patients who who underwent TNFi tapering. | Not cited.  Incidence of 99% | No types identified | Higher baseline physician global score was an independent predictor of flare but imaging did not predict flare. |
| Park et al (20) | Prospective data from Korean College of Rheumatology Biologics and Targeted Therapy Registry/ **526** | Patients who received the standard-dose TNFi for at least 1 year and tapered with ASDAS CRP >2.1 after1 year of tapering | Developed a prediction model using ASDAS-CRP, BASFI, and clinical parameters post-TNFi tapering/ Incidence of 24.1% | No types identified. | A model with 8 clinical variables predicted flare risk post-TNFi tapering with high accuracy (AUC = 0.828). Patients categorized into low, intermediate, and high-risk groups. |
| Rosemarie Barnett et al (14) | Smartphone application based daily tracking/ **189** | Patient reported flares on a 5-point Likert scale. | Not cited.  Incidence of 75.7% | Two clusters- Group 1 had less severe but prolonged flare.  Group 2 had worse pain, mood, fatigue during flare. | Statistically significant differences between both clusters. |
| Brophy and Calin (16) | Questionnaire method/ **214** | Patient-reported flares | Physical and emotional stress, overactivity, weather (cold, damp), random, jarring of a joint/a fall, inactivity, cold/ flu. Incidence of 100%. | Generalized, localized flares. | Identified types of flare and triggers for flare. |
| Jacquemin et al (17) | Cross- sectional questionnaire based / **234** | Patient-reported flares | Not cited.  Incidence of 74.8%. | No types identified | Shorter time since onset of disease, higher BASDAI, less anti-TNF treatment, worse quality of life were associated with current flare. |
| Current study | Longitudinal cohort/ **106** | Patient- reported flare and ASAS validated measures | Unknown associations (51%), drug default (30%) and infections (19%).  Incidence of 63.2% | Generalised flares -divided into pure axial flare, oligo or polyarticular involvement, multiple entheseal involvement, axial and peripheral, axial and enthesitis, peripheral arthritis and enthesitis.  Localised flares - further divided into isolated enthesitis, isolated monoarticular involvement or uveitis flare | Disease duration less than 6 years, nr-axSpA, steroid requirement at baseline, drug default, current/ past history of enthesitis at baseline and high disease activity at baseline |

Supplementary Table 1: **Comparison of studies conducted on flare in SpA.**
